# Supplementary material for: Hydroformylation in fluorous solventsElectronic supplementary information (ESI) available: typical experimental details. See http://www.rsc.org/suppdata/cc/b1/b110061k/
Source: Royal Society of Chemistry journal article supplement (doi:10.1039/b110061k), 2002-03-06
Supplement: b110061k.doc [file b110061k.doc]

# Supplementary data

A typical experiment was performed as follows: An autoclave, previously flushed with CO/H2 (1:1) and fitted with a substrate injector containing 1-octene (1 cm3, 6.37 mmol), a mechanical stirrer, a gas delivery system, an injection port and a thermocouple was charged with degassed perfluoro-1,3-dimethylcyclohexane (4 cm3) containing dicarbonyl(2,4-pentanedionato)rhodium(I) ([Rh(acac)(CO)2], 0.01 mmol) and P(O-4-C6H4C6F13)3 (0.03 mmol). After further flushing with CO/H2 (1:1, 20 bar), the autoclave was pressurised with CO/H2 (1:1) to 16 bar, the stirrer was started (1000 rpm) and the autoclave was heated to 60 ˚C for 45 mins. 1-octene was then added through a substrate injector using a CO/H2 pressure of 20 bar. The pressure was kept constant (20 bar) by passing gas from a ballast vessel through a mass-flow controller. The reaction kinetics were obtained from the pressure drop in the ballast vessel, which was recorded electronically every 5 s. After 1 hour, the stirrer was stopped and the autoclave was allowed to cool. The gases were vented and the mixture was syringed into a sample vial. The phases were immediately separated using a pasteur pipette and then analysed. The colourless organic phase was analysed for its organic components by GCFID and GCMS, and for its rhodium and phosphorus content by ICPMS. Samples of the as-obtained organic phases were diluted with 9 x the volume of pure xylene prior to the ICPMS analysis. The fluorous phase was analysed for its organic content by GCFID and GCMS.
